# Supplementary material for: A DMSO-assisted iridium(iii) complex as a luminescent “turn-on” sensor for selective detection of l-histidine and bacterial imaging
Source: Royal Society of Chemistry journal article supplement (doi:10.1039/d4ay01431f), 2024-01-01
Supplement: d4ay01431f1.pdf [file d4ay01431f1.pdf]

;

**A DMSO-assisted iridium(III) complex as luminescent “turn-on” sensor for selective detection of L-histidine and bacterial imaging**

Xiaojuan Li,<sup>a</sup> Tianqian Jia,<sup>a</sup> Yueyan Wang,<sup>a</sup> Yanyan Zhang,<sup>a</sup> Du Yang,<sup>a</sup> Sicheng Zhai<sup>a</sup>  
and Shuming Li\*<sup>b</sup>

<sup>a</sup> School of Medical Engineering, Haojing College of Shaanxi University of Science & Technology, Xianyang 712046, Shaanxi, P.R. China.

<sup>b</sup> Co-construction Collaborative Innovation Center for Chinese Medicine Resources Industrialization by Shaanxi & Education Ministry, Shaanxi University of Chinese Medicine, Xianyang, 712083, Shaanxi, P.R. China. E-mail: 1501034@sntcm.edu.cn

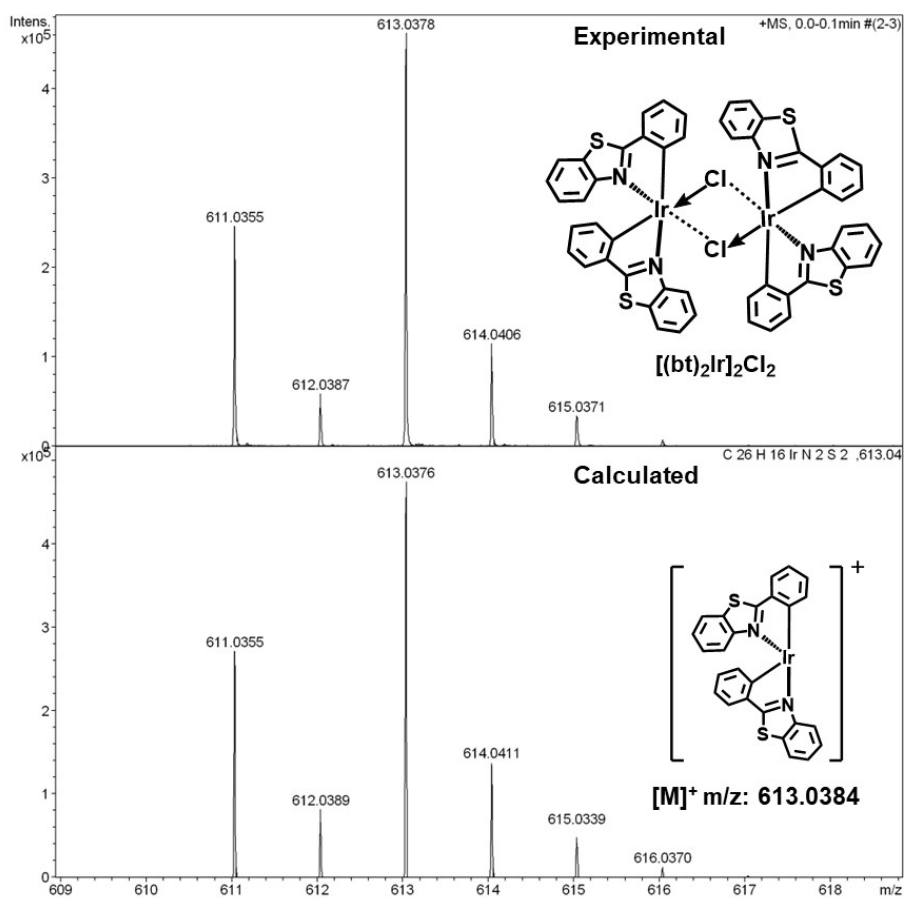

**Fig. S1** Mass spectrum of Ir1 experimental and calculated spectra of peak.

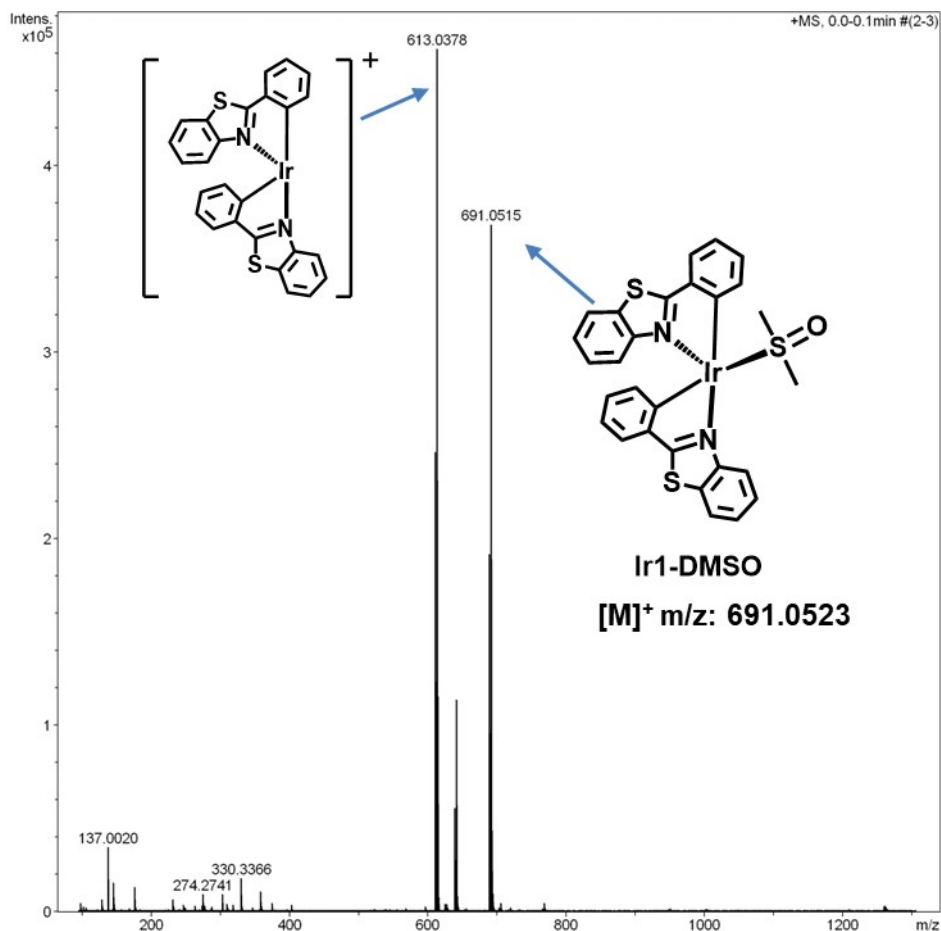

**Fig. S2** Mass spectrum of Ir1-DMSO experimental and calculated spectra of peak with  $m/z = 691.0523$ .

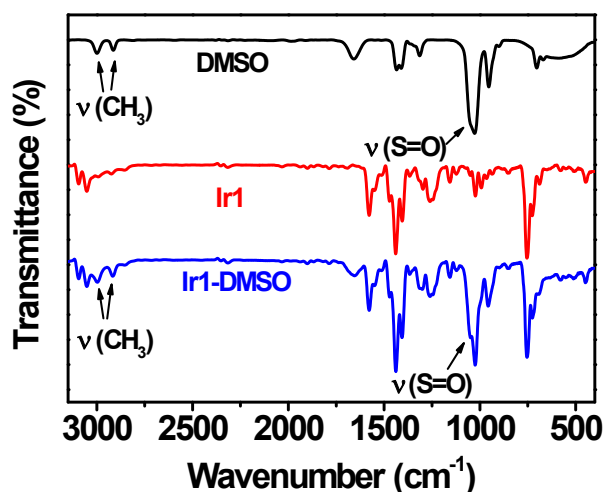

**Fig. S3** FTIR spectra of DMSO, Ir1, and Ir1-DMSO.

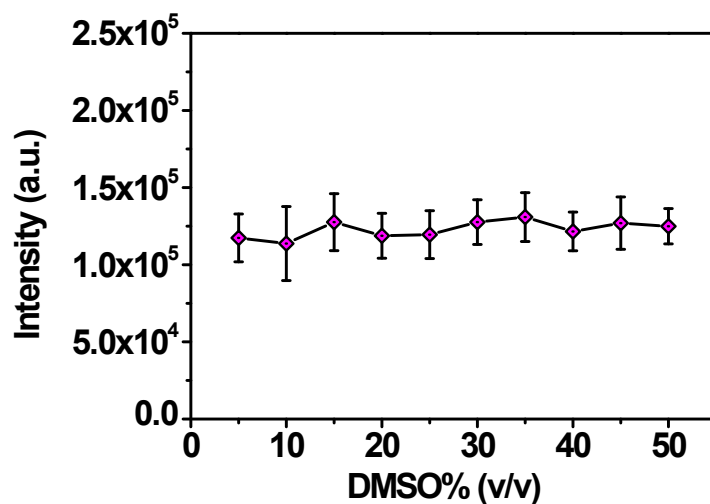

**Fig. S4** The PL intensity of Ir1 in different volumes of DMSO solvent.

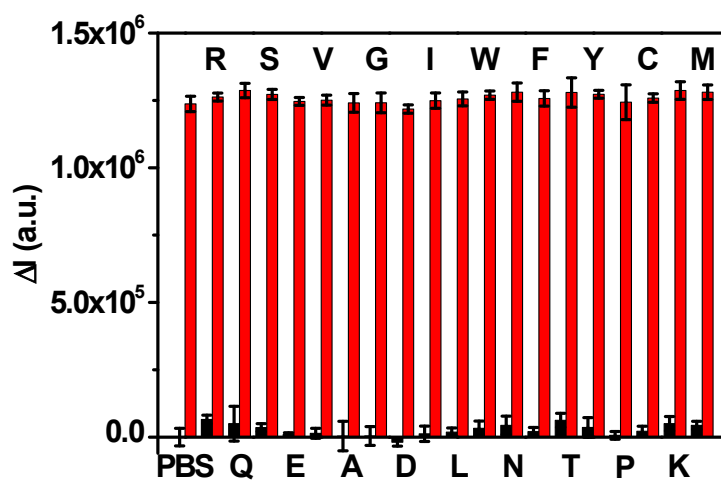

**Fig. S5** Relative emission intensity of Ir1-DMSO in presence and absence of L-His and others interfering amino acids (50 μM).  $\Delta I = I - I_0$ , I and  $I_0$  represents the PL intensity of Ir1-DMSO with or without various amino acids.

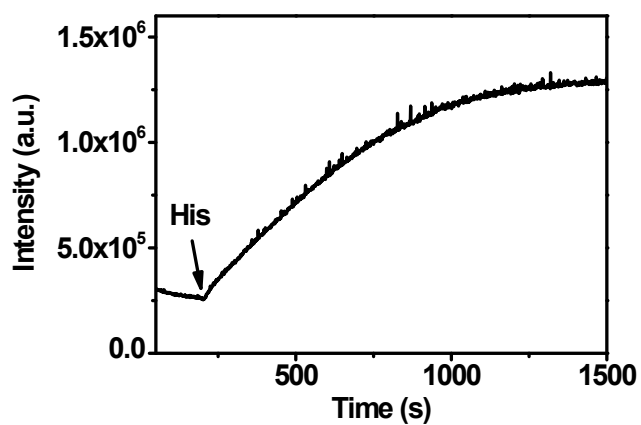

**Fig. S6** Time course of photoluminescence emission intensity of Ir1-DMSO before and after adding L-His.

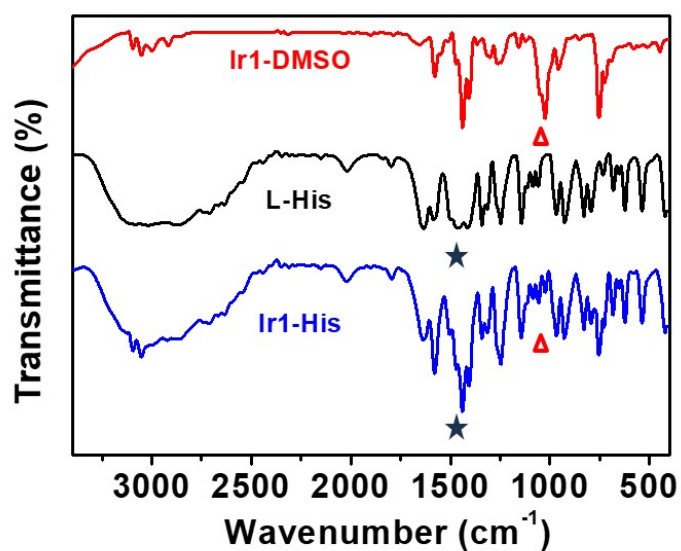

**Fig. S7** FTIR spectra of Ir1-DMSO, L-His, and Ir1-His.

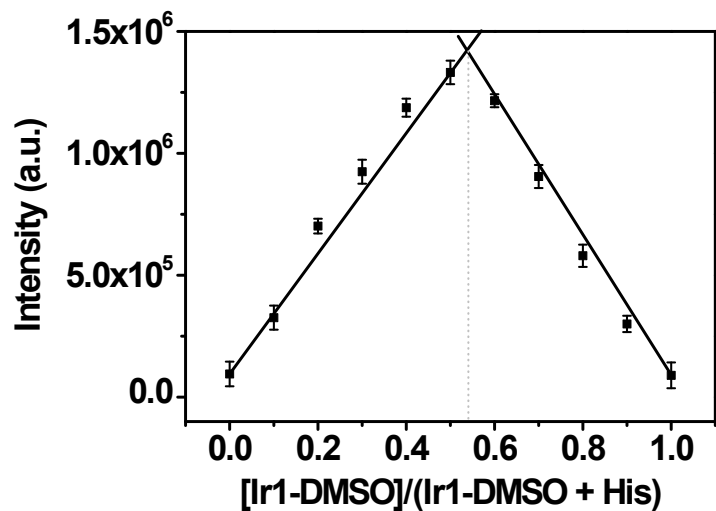

**Fig. S8** Job's plot of fluorescence intensity at 540 nm of Ir1-His vs. concentration fraction Ir1-DMSO for a total concentration (Ir1-DMSO + L-His) of 100  $\mu$ M. The intersection of the two linear parts at 0.54.

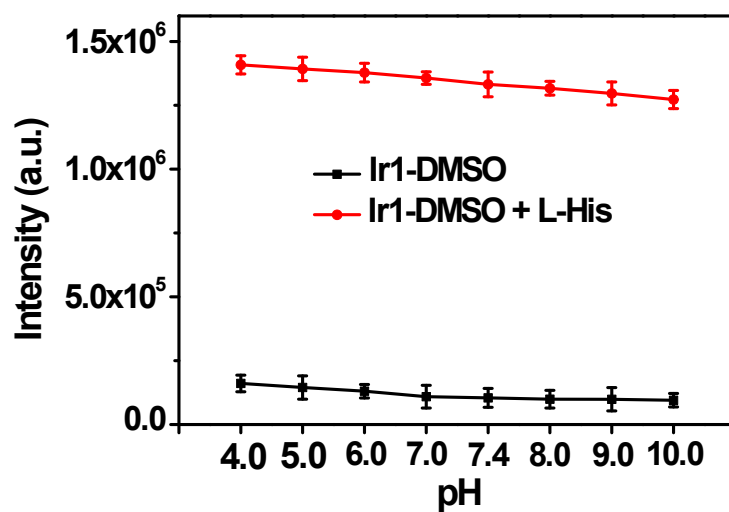

**Fig. S9** The PL intensity of Ir1-DMSO at 540 nm in the presence and absence of L-His in different pH solutions.

**Table S1** Comparison of linear range and detection limit for His assay

| Materials                                          | Methods                         | Linear range          | Detection limit | Ref.         |
|----------------------------------------------------|---------------------------------|-----------------------|-----------------|--------------|
| o-Phthalaldehyde                                   | Chromatography-<br>Fluorescence | 0.5–25 $\mu\text{M}$  | 160 nM          | [S1]         |
| lanthanide-based MOF<br>(Eu <sup>3+</sup> @Mn-MOF) | Fluorescence                    | 0–325 $\mu\text{M}$   | 230 nM          | [S2]         |
| {Zn <sub>4</sub> } cluster                         | Fluorescence                    | 5–32.5 $\mu\text{M}$  | 830 nM          | [S3]         |
| Carbon Dots                                        | Fluorescence                    | 0.05–10 $\mu\text{M}$ | 35 nM           | [S4]         |
| Nitrogen-doped carbon<br>nanoparticle              | Fluorescence                    | 0.5–60 $\mu\text{M}$  | 150 nM          | [S5]         |
| Bacterial Cellulose–<br>Based MOF Hybrid           | Fluorescence                    | 0.01–40 $\mu\text{M}$ | 7 nM            | [S6]         |
| Iridium(III) complexes                             | Fluorescence                    | 2–32.5 $\mu\text{M}$  | 35 nM           | [S7]         |
| Ir(III) solvent complex                            | Fluorescence                    | /                     | 620 nM          | [S8]         |
| Ir(III)-DMSO complex                               | Fluorescence                    | 0.2–10 $\mu\text{M}$  | 80 nM           | This<br>work |

## Reference:

- [S1] E. Stampina, A. Tsiasioti, K. Klimatsaki, C. K. Zacharis and P. D. Tzanavaras, *J. Chromatogr. B* 2021, **1173**, 122697.
- [S2] J. Xiao, L. Song, M. Liu, X. Wang and Z. Liu, *Inorg. Chem.* 2020, **59**, 6390–6397.
- [S3] J. Li, K. Ma, Y. Yang, H. Yang, J. Lu, D. Li, J. Dou, H. Ma, S. Wang and Y. Li, *J. Mater. Chem. C*, 2022, **10**, 8979–8993.
- [S4] W. Lu, Y. Jiao, Y. Gao, J. Qiao, M. Mozneb, S. Shuang, C. Dong and C. Li, *ACS Appl. Mater. Interfaces*, 2018, **10**, 42915–42924.
- [S5] X. Zhu, T. Zhao, Z. Nie, Z. Miao, Y. Liu and S. Yao, *Nanoscale*, 2016, **8**, 2205–2211.
- [S6] A. F. Kateshali, F. Moghzi, J. Soleimannejad and J. Janczak, *Inorg. Chem.*, 2024, **63**, 3560–3571.
- [S7] L. Hu, X. Chen, K. Yu, N. Huang, H. Du, Y. Wei, Y. Wu and H. Wang, *Spectrochim. Acta A*, 2021, **262**, 120095.
- [S8] H. Wang, B. Xu, H. Chen, D. Li, X. Shen, F. Cai, Y. Xu, L. Zhou and L. Hu, *Inorg. Chim. Acta*, 2020, **511**, 119799.
